# The American Journal of Psychiatry

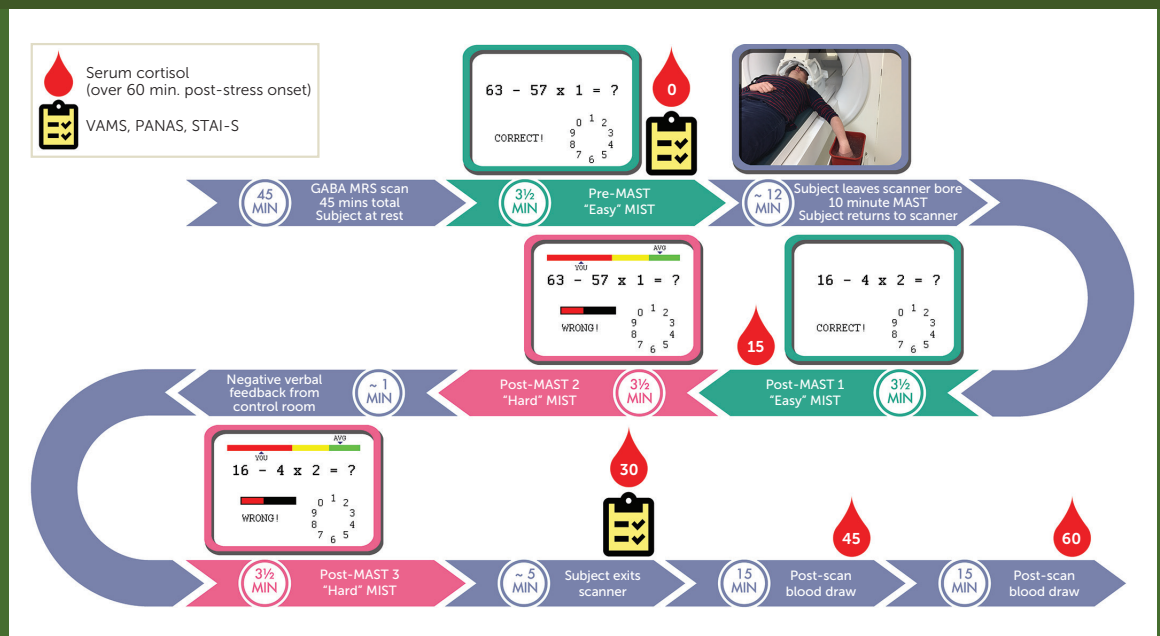

## Pharmacogenomic Clinical Support Tools for the Treatment of Depression

Association of Lower Rostral Anterior Cingulate GABA+ and Dysregulated Cortisol Stress Response With Altered Functional Connectivity in Young Adults With Lifetime Depression

Genome-Wide Association Study of Treatment-Resistant Depression: Shared Biology With Metabolic Traits

Associations Between General and Specific Mental Health Conditions in Young Adulthood and Cardiometabolic Complications in Middle Adulthood
